# Supplementary material for: Melting ice, growing trade?
Source: Oxford University Press journal article supplement (doi:10.12952/journal.elementa.000107), 2016-01-01
Supplement: elementa_000107_s004.docx [file elementa_000107_s004.docx]

**Table S2. NSR transit data for the years 2011–2014**a

| Type of passage | Number of passages by year | | | |
| --- | --- | --- | --- | --- |
| 2011 | 2012 | 2013 | 2014 |
| Total number of passages | 41 | 46 | 71 | 53 |
| East to West | 11 | 21 | 41 | 17 |
| West to East | 30 | 25 | 30 | 36 |
| Trans-NSR | -b | 40 | 43 | 31 |
| Trans-Arctic | -c | 14 | 17 | -c |
| Liquid and bulk carriers | 20 | 32 | 34 | 28 |

aSource: Northern Sea Route Information Office, Transit statistics (<http://www.arctic-lio.com/nsr_transits>) and authors’ calculations

bThe number of trans-NSR passages was not available for the year 2011 due to missing data.

cThe number of trans-Arctic passages was not possible to determine for the years 2011 and 2014 as the starting and end points of the ships’ journeys were not available.
