# Supplementary material for: Melting ice, growing trade?
Source: Oxford University Press journal article supplement (doi:10.12952/journal.elementa.000107), 2016-01-01
Supplement: elementa_000107_s007.docx [file elementa_000107_s007.docx]

**Table S5: List of countries considered in our study**

| Continent | Countries |
| --- | --- |
| Europe | Belgium, Denmark, Estonia, Finland, France, Germany, Ireland, Italya, Latvia, Lithuania, Netherlands, Poland, Portugalb, Spainc, Sweden, United Kingdom |
| Asia | China, Hong Kong, Japan, Philippines, South Korea |

a The use of the NSR reduces the maritime distance only between Italy and Japan.

b The use of the NSR reduces the maritime distances only between Portugal and Japan, South Korea and China.

c The use of the NSR reduces the maritime distances only between Portugal and Japan and South Korea.
