# Supplementary figures and images for: Melting ice, growing trade?
Source: Oxford University Press journal article supplement (doi:10.12952/journal.elementa.000107), 2016-01-01

**Figure S1. Map and bathymetry of the NSR route as defined in this study.
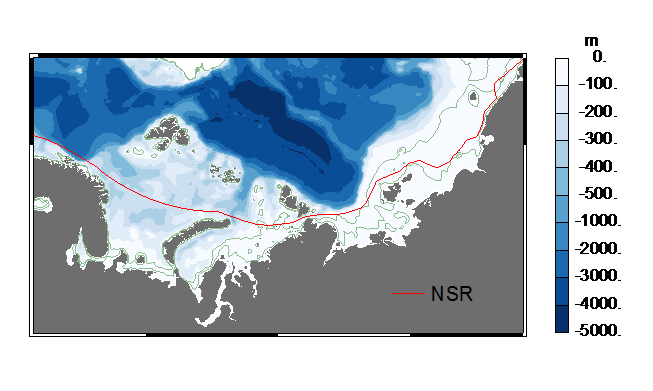
**

Supplement: elementa_000107_s002.docx [file elementa_000107_s002.docx]
